# Supplementary material for: Comparative Analysis of Acanthopanacis Cortex and Periplocae Cortex Using an Electronic Nose and Gas Chromatography–Mass Spectrometry Coupled with Multivariate Statistical Analysis
Source: MDPI journal article supplement (doi:10.3390/molecules27248964), 2022-12-16
Supplement: s1 [file s1]

**Supplementary Materials:**

**Table S1.** Details of samples of Acanthopanax Cortex and Periplocae Cortex.

| No.  | Sample Name                    | Batch Code    | Origin           | Collection place                           |
|------|--------------------------------|---------------|------------------|--------------------------------------------|
| W-01 | Acanthopanax Cortex            | 20201001      | Jilin Province   | Drug store, Jingmen, Hubei                 |
| W-02 | Acanthopanax Cortex            | 201907001     | Hebei Province   | Drug store, Xiangyang, Hubei               |
| W-03 | Acanthopanax Cortex            | 180101        | Hubei Province   | Drug store, Xiangyang, Hubei               |
| W-04 | Acanthopanax Cortex            | 2020903100200 | Hubei Province   | Drug store, Xiangyang, Hubei               |
| W-05 | Acanthopanax Cortex            | Not marked    | Not marked       | Drug store, Xiangyang, Hubei               |
| W-06 | Acanthopanax Cortex            | 202101001     | Hunan Province   | Drug store, Xiangyang, Hubei               |
| W-07 | Acanthopanax Cortex            | Not marked    | Hubei Province   | Drug store, Xiangyang, Hubei               |
| W-08 | Acanthopanax Cortex            | 2110210011    | Hubei Province   | Hospital, Xiangyang, Hubei                 |
| W-09 | Acanthopanax Cortex            | 20200601      | Hubei Province   | CHMs company, xiangyang, Hubei             |
| W-10 | Acanthopanax Cortex            | Not marked    | Not marked       | Drug store, Xiangyang, Hubei               |
| W-11 | Acanthopanax Cortex            | 210801        | Shanxi Province  | Medicine Market, Bozhou, Anhui             |
| W-12 | Acanthopanax Cortex            | 210101        | Shannxi Province | Medicine Market, Bozhou, Anhui             |
| W-13 | Acanthopanax Cortex            | 200801        | Shanxi Province  | Medicine Market, Bozhou, Anhui             |
| W-14 | Acanthopanax Cortex            | 201102        | Shannxi Province | Medicine Market, Bozhou, Anhui             |
| W-15 | Acanthopanax Cortex            | 201101        | Shannxi Province | Medicine Market, Bozhou, Anhui             |
| W-16 | Acanthopanax Cortex            | 160405        | Anhui Province   | Drug store, Xiangyang, Hubei               |
| X-01 | Periplocae Cortex              | 202004001     | Hebei Province   | Drug store, Xiangyang, Hubei               |
| X-02 | Periplocae Cortex              | Not marked    | Henan Province   | Drug store, Xiangyang, Hubei               |
| X-03 | Periplocae Cortex              | Not marked    | Not marked       | Hospital, Xiangyang, Hubei                 |
| X-04 | Periplocae Cortex              | Not marked    | Not marked       | Drug store, Xiangyang, Hubei               |
| X-05 | Periplocae Cortex              | 210501        | Shannxi Province | Medicine Market, Bozhou, Anhui             |
| X-06 | Periplocae Cortex              | 210401        | Shannxi Province | Medicine Market, Bozhou, Anhui             |
| X-07 | Periplocae Cortex              | 200901        | Shanxi Province  | Medicine Market, Bozhou, Anhui             |
| X-08 | Periplocae Cortex              | 200801        | Shannxi Province | Medicine Market, Bozhou, Anhui             |
| X-09 | Periplocae Cortex              | 201101        | Not marked       | Medicine Market, Bozhou, Anhui             |
| X-10 | Periplocae Cortex <sup>a</sup> | 20160501      | Hubei Province   | CHM company, xiangyang, Hubei <sup>a</sup> |
| X-11 | Periplocae Cortex <sup>b</sup> | 170625        | Anhui Province   | Clinic, Xiangyang, Hubei <sup>b</sup>      |
| X-12 | Periplocae Cortex <sup>b</sup> | 171203        | Anhui Province   | Drug store, Xiangyang, Hubei <sup>b</sup>  |
| X-13 | Periplocae Cortex <sup>c</sup> | Not marked    | Hubei Province   | Drug store, Xiangyang, Hubei <sup>c</sup>  |

<sup>a</sup> Retention samples of the supervision and inspection samples in 2019 (Sample name marked Acanthopanax Cortex);

<sup>b</sup> Retention samples of the supervision and inspection samples in 2018 (Sample name marked Acanthopanax Cortex);

<sup>c</sup> Samples for supervision and inspection in 2021 (Sample name marked Acanthopanax Cortex).

**Table S2.** Sensors used and their main applications in PEN3 E-nose.

| Sensor number | Sensor name      | General description                                                                                              |
|---------------|------------------|------------------------------------------------------------------------------------------------------------------|
| 1             | W <sub>1</sub> C | Aromatic compounds                                                                                               |
| 2             | W <sub>5</sub> S | Very sensitive, broad range of sensitivity, reacts to nitrogen oxides, very sensitive with negative signals      |
| 3             | W <sub>3</sub> C | Ammonia, used as sensor for aromatic compounds                                                                   |
| 4             | W <sub>6</sub> S | Mainly hydrogen                                                                                                  |
| 5             | W <sub>5</sub> C | Alkanes, aromatic compounds, less polar compounds                                                                |
| 6             | W <sub>1</sub> S | Sensitive to methane. Broad range                                                                                |
| 7             | W <sub>1</sub> W | Reacts on sulfur compounds, H <sub>2</sub> S. Otherwise sensitive to many terpenes and sulphur organic compounds |
| 8             | W <sub>2</sub> S | Detects alcohol's, partially aromatic compounds, broad range                                                     |
| 9             | W <sub>2</sub> W | Aromatic compounds, sulphur organic compounds                                                                    |
| 10            | W <sub>3</sub> S | Reacts on high concentrations (> 100 ppm) of methane-aliphatic compounds                                         |

**Table S3.** *P* value of volatile organic compounds (VOCs) with VIP > 1 in OPLS-DA model analysis.

| No. | VOCs                                                                                                | Formula                                        | VIP     | P      |
|-----|-----------------------------------------------------------------------------------------------------|------------------------------------------------|---------|--------|
| 33  | 2-Hydroxy-4-methoxybenzaldehyde                                                                     | C <sub>8</sub> H <sub>8</sub> O <sub>3</sub>   | 1.62062 | < 0.05 |
| 16  | (1R,5S)-6,6-dimethyl-bicyclo[3.3.1]hept-2-en-2-carbaldehyde                                         | C <sub>10</sub> H <sub>14</sub> O              | 1.49172 | < 0.05 |
| 68  | methyl 2-hydroxy-4-methoxybenzoate                                                                  | C <sub>9</sub> H <sub>10</sub> O <sub>4</sub>  | 1.48045 | < 0.05 |
| 8   | (1S,5S)-7,7-dimethyl-4-methylidenebicyclo[3.1.1]heptan-3-ol                                         | C <sub>10</sub> H <sub>16</sub> O              | 1.44243 | < 0.05 |
| 20  | (1R,5S)-2-methyl-5-prop-1-en-2-ylcyclohex-2-en-1-ol                                                 | C <sub>10</sub> H <sub>16</sub> O              | 1.43818 | < 0.05 |
| 25  | 2,7,7-trimethylbicyclo[3.1.1]hept-2-en-4-one                                                        | C <sub>10</sub> H <sub>14</sub> O              | 1.43137 | < 0.05 |
| 12  | 2-(4-methyl-1-cyclohexa-2,4-dienyl)propan-2-ol                                                      | C <sub>12</sub> H <sub>20</sub> O <sub>3</sub> | 1.3873  | < 0.05 |
| 7   | 1-(2,2,3-trimethyl-1-cyclopent-3-enyl)ethanone                                                      | C <sub>10</sub> H <sub>16</sub> O              | 1.37597 | < 0.05 |
| 15  | 2-[(1R)-4-methyl-1-cyclohex-3-enyl]propan-2-ol                                                      | C <sub>10</sub> H <sub>18</sub> O              | 1.35918 | < 0.05 |
| 19  | (1S,5S)-2,7,7-trimethylbicyclo[3.1.1]hept-2-en-4-one                                                | C <sub>10</sub> H <sub>14</sub> O              | 1.34432 | < 0.05 |
| 10  | 2-(4-methylidene-1-cyclohex-2-enyl)propan-2-ol                                                      | C <sub>12</sub> H <sub>20</sub> O <sub>3</sub> | 1.3365  | < 0.05 |
| 66  | 5-formyl-2-methoxyphenyl acetate                                                                    | C <sub>10</sub> H <sub>10</sub> O <sub>4</sub> | 1.29551 | < 0.05 |
| 24  | (5S)-2-methyl-5-prop-1-en-2-ylcyclohex-2-en-1-one                                                   | C <sub>10</sub> H <sub>14</sub> O              | 1.27463 | < 0.05 |
| 62  | 3,4,5-trimethyloxolan-2-one                                                                         | C <sub>7</sub> H <sub>12</sub> O <sub>2</sub>  | 1.27007 | < 0.05 |
| 11  | 7,7-dimethyl-4-methylidenebicyclo[3.1.1]heptan-3-one                                                | C <sub>10</sub> H <sub>14</sub> O              | 1.25103 | < 0.05 |
| 13  | (1R)-4-methyl-1-propan-2-ylcyclohex-3-en-1-ol                                                       | C <sub>10</sub> H <sub>18</sub> O              | 1.23982 | < 0.05 |
| 14  | 2-(4-methylphenyl)propan-2-ol                                                                       | C <sub>10</sub> H <sub>14</sub> O              | 1.23523 | < 0.05 |
| 17  | Dodecane                                                                                            | C <sub>12</sub> H <sub>26</sub>                | 1.21744 | < 0.05 |
| 51  | (1aR,4aR,7S,7aR,7bR)-1,1,7-Trimethyl-4-methylenedecahydro-1H-cyclopropa[e]azulen-7-ol               | C <sub>15</sub> H <sub>24</sub> O              | 1.21026 | < 0.05 |
| 58  | 5-(5,5,8a-trimethyl-2-methylidene-3,4,4a,6,7,8-hexahydro-1H-naphthalen-1-yl)-3-methylpent-1-en-3-ol | C <sub>20</sub> H <sub>34</sub> O              | 1.19979 | < 0.05 |

|    |                                                                             |                                              |         |        |
|----|-----------------------------------------------------------------------------|----------------------------------------------|---------|--------|
| 71 | 2,4-ditert-butylphenol                                                      | C <sub>14</sub> H <sub>22</sub> O            | 1.16325 | < 0.05 |
| 52 | (1R,4R,6R,10S)-4,12,12-Trimethyl-9-methylene-5-oxatricyclo[8.2.0.0]dodecane | C <sub>15</sub> H <sub>24</sub> O            | 1.14638 | < 0.05 |
| 29 | [(4S)-4-prop-1-en-2-yl-1-cyclohexenyl]methanol                              | C <sub>10</sub> H <sub>16</sub> O            | 1.13892 | < 0.05 |
| 64 | 3-Hydroxy-4-methoxybenzaldehyde                                             | C <sub>8</sub> H <sub>8</sub> O <sub>3</sub> | 1.05977 | < 0.05 |
